# Supplementary material
Source: ML conference proceedings conference paper supplement (https://openaccess.thecvf.com/content/cvpr_2016/html/Wu_Ask_Me_Anything_2016_CVPR_paper.html)
Supplement: Supplementary file 1 [file Wu_Ask_Me_Anything_2016_CVPR_supplemental.pdf]

# Ask Me Anything: Free-form Visual Question Answering Based on Knowledge from External Sources Supplementary Material

Qi Wu, Peng Wang, Chunhua Shen, Anthony Dick, Anton van den Hengel  
School of Computer Science, The University of Adelaide, Australia

{qi.wu01,p.wang,chunhua.shen,anthony.dick,anton.vandenhengel}@adelaide.edu.au

In this supplementary material, we provide additional VQA examples generated using our system. The questions in the table 1, 2 and table 3 all start with ‘why ...?’. To answer these questions would typically require human common-sense or even high-level knowledge. We display a set of examples for which our final model gives the right answer while the base line model **VggNet-LSTM** generates the wrong answer. Table 4 and table 5 shows examples where our final model gives the right answer while the base line model **VggNet-LSTM** generates the wrong answer, for various question types. Table 6 provides some failure examples produced by our system.

|                                                                                     |                                                                                     |
|-------------------------------------------------------------------------------------|-------------------------------------------------------------------------------------|
|  |  |
| Why is she wearing a crown?                                                         | Why is he smiling?                                                                  |
| <i>Ours:</i> birthday                                                               | <i>Ours:</i> happy                                                                  |
| <i>Vgg+LSTM:</i> to eat                                                             | <i>Vgg+LSTM:</i> unknown                                                            |
| <i>Ground Truth:</i> birthday                                                       | <i>Ground Truth:</i> happy                                                          |
|  |  |
| Why is the zebra on the ground?                                                     | Why is a man sitting under an umbrella?                                             |
| <i>Ours:</i> resting                                                                | <i>Ours:</i> shade                                                                  |
| <i>Vgg+LSTM:</i> eat                                                                | <i>Vgg+LSTM:</i> safety                                                             |
| <i>Ground Truth:</i> resting                                                        | <i>Ground Truth:</i> shade                                                          |

Table 1. Some examples for which our final model gives the right answer while the base line model **VggNet-LSTM** generates the wrong answer. All questions start with ‘why’ and some can only be answered with common sense knowledge.

|                                                                                      |                                                                                       |
|--------------------------------------------------------------------------------------|---------------------------------------------------------------------------------------|
|    |    |
| Why do they have umbrellas                                                           | Why is he swinging backhand?                                                          |
| <i>Ours:</i> raining                                                                 | <i>Ours:</i> to hit ball                                                              |
| <i>Vgg+LSTM:</i> yes                                                                 | <i>Vgg+LSTM:</i> tennis ball                                                          |
| <i>Ground Truth:</i> raining                                                         | <i>Ground Truth:</i> to hit ball                                                      |
|  |  |
| Why are they wearing such bright colors?                                             | Why are the men wearing orange?                                                       |
| <i>Ours:</i> safety                                                                  | <i>Ours:</i> team                                                                     |
| <i>Vgg+LSTM:</i> yes                                                                 | <i>Vgg+LSTM:</i> to                                                                   |
| <i>Ground Truth:</i> safety                                                          | <i>Ground Truth:</i> team                                                             |
|  |  |
| Why is the man jumping?                                                              | Why is this room warm?                                                                |
| <i>Ours:</i> skateboarding                                                           | <i>Ours:</i> fireplace                                                                |
| <i>Vgg+LSTM:</i> unknown                                                             | <i>Vgg+LSTM:</i> to sleep                                                             |
| <i>Ground Truth:</i> skateboarding                                                   | <i>Ground Truth:</i> fireplace                                                        |

Table 2. Some examples for which our final model gives the right answer while the base line model **VggNet-LSTM** generates the wrong answer. All questions start with ‘why’ and some of them can only be answered with common sense knowledge.

|                                                                                     |                                                                                     |                                                                                      |                                                                                       |
|-------------------------------------------------------------------------------------|-------------------------------------------------------------------------------------|--------------------------------------------------------------------------------------|---------------------------------------------------------------------------------------|
|    |    |    |    |
| Why is this person wet?                                                             | Why is the baby wearing a snowsuit?                                                 | Why does the boy have his arms in that position?                                     | Why are two of the giraffes so much shorter than the other three?                     |
| <i>Ours:</i> surfing                                                                | cold                                                                                | balance                                                                              | they are babies                                                                       |
| <i>Vgg+LSTM:</i> beach                                                              | safety                                                                              | to catch                                                                             | yes                                                                                   |
| <i>Ground Truth:</i> surfing                                                        | cold                                                                                | balance                                                                              | babies                                                                                |
|    |    |     |    |
| Why do these sheep have paint on them?                                              | Why is this ground white?                                                           | Why is there sand around the orange object?                                          | Why is the man wearing black there?                                                   |
| <i>Ours:</i> identification                                                         | snow                                                                                | safety                                                                               | umpire                                                                                |
| <i>Vgg+LSTM:</i> to eat                                                             | cold                                                                                | to balance                                                                           | safety                                                                                |
| <i>Ground Truth:</i> identification                                                 | snow                                                                                | safety                                                                               | umpire                                                                                |
|   |   |   |   |
| Why is she wearing a potholder on her arm?                                          | Why is the road closed?                                                             | Why are there no leaves on the trees?                                                | Why does he have glasses on?                                                          |
| <i>Ours:</i> cooking                                                                | train                                                                               | winter                                                                               | to see                                                                                |
| <i>Vgg+LSTM:</i> drinking                                                           | stop                                                                                | unknown                                                                              | to be                                                                                 |
| <i>Ground Truth:</i> cooking                                                        | train                                                                               | winter                                                                               | to see                                                                                |
|  |  |  |  |
| Why is the ground wet?                                                              | Why are the animals laying here?                                                    | Why is the man running?                                                              | Why is the cat sitting on the bench?                                                  |
| <i>Ours:</i> rain                                                                   | resting                                                                             | playing frisbee                                                                      | resting                                                                               |
| <i>Vgg+LSTM:</i> cold                                                               | no                                                                                  | running                                                                              | to sleep                                                                              |
| <i>Ground Truth:</i> rain                                                           | resting                                                                             | playing frisbee                                                                      | resting                                                                               |
|  |  |   |  |
| Why are her hands in the air?                                                       | Why is the man standing?                                                            | Why is the child running?                                                            | Why is there a giraffe in this setting?                                               |
| <i>Ours:</i> flying kite                                                            | playing tennis                                                                      | flying kite                                                                          | zoo                                                                                   |
| <i>Vgg+LSTM:</i> surfing                                                            | tennis ball                                                                         | playing frisbee                                                                      | to eat                                                                                |
| <i>Ground Truth:</i> flying kite                                                    | playing tennis                                                                      | flying kite                                                                          | zoo                                                                                   |

Table 3. Some examples for which our final model gives the right answer while the base line model **VggNet-LSTM** generates the wrong answer. All questions start with ‘why’ and some can only can be answered with common sense knowledge.



|                                                                                   |                                                                                   |                                                                                    |                                                                                     |
|-----------------------------------------------------------------------------------|-----------------------------------------------------------------------------------|------------------------------------------------------------------------------------|-------------------------------------------------------------------------------------|
|  |  |  |  |
| What kind of weather it is?                                                       | What is in the cup?                                                               | What kind of room is this?                                                         | Where did the water come from?                                                      |
| <i>Ours:</i> sunny                                                                | coffee                                                                            | bedroom                                                                            | ocean                                                                               |
| <i>Vgg+LSTM:</i> cloudy                                                           | wine                                                                              | living                                                                             | beach                                                                               |
| <i>Ground Truth:</i> sunny                                                        | coffee                                                                            | bedroom                                                                            | ocean                                                                               |

---

|                                                                                   |                                                                                   |                                                                                   |                                                                                     |
|-----------------------------------------------------------------------------------|-----------------------------------------------------------------------------------|-----------------------------------------------------------------------------------|-------------------------------------------------------------------------------------|
|  |  |  |  |
| What game is being played on the beach?                                           | How many busses are there?                                                        | Is the person wearing a shirt?                                                    | What is the colorful object in the middle of the image?                             |
| <i>Ours:</i> volleyball                                                           | 1                                                                                 | no                                                                                | kite                                                                                |
| <i>Vgg+LSTM:</i> soccer                                                           | 2                                                                                 | yes                                                                               | frisbee                                                                             |
| <i>Ground Truth:</i> volleyball                                                   | 1                                                                                 | no                                                                                | kite                                                                                |

---

|                                                                                    |                                                                                    |                                                                                     |                                                                                      |
|------------------------------------------------------------------------------------|------------------------------------------------------------------------------------|-------------------------------------------------------------------------------------|--------------------------------------------------------------------------------------|
|  |  |  |  |
| What are the children holding?                                                     | Where is this picture?                                                             | What kind of cheese is this?                                                        | What room is this?                                                                   |
| <i>Ours:</i> teddy bears                                                           | market                                                                             | mozzarella                                                                          | bathroom                                                                             |
| <i>Vgg+LSTM:</i> wii                                                               | on left                                                                            | chicken                                                                             | kitchen                                                                              |
| <i>Ground Truth:</i> teddy bears                                                   | market                                                                             | mozzarella                                                                          | bathroom                                                                             |

---

|                                                                                     |                                                                                     |                                                                                      |                                                                                       |
|-------------------------------------------------------------------------------------|-------------------------------------------------------------------------------------|--------------------------------------------------------------------------------------|---------------------------------------------------------------------------------------|
|  |  |  |  |
| What style of cooking is this?                                                      | Is this a men's room or a women's room?                                             | What is on the top of the animals' heads?                                            | Is this a vegetable?                                                                  |
| <i>Ours:</i> chinese                                                                | men's                                                                               | horns                                                                                | yes                                                                                   |
| <i>Vgg+LSTM:</i> pizza                                                              | hotel                                                                               | rocks                                                                                | no                                                                                    |
| <i>Ground Truth:</i> chinese                                                        | men's                                                                               | horns                                                                                | yes                                                                                   |

---

|                                                                                     |                                                                                     |                                                                                      |                                                                                       |
|-------------------------------------------------------------------------------------|-------------------------------------------------------------------------------------|--------------------------------------------------------------------------------------|---------------------------------------------------------------------------------------|
|  |  |  |  |
| What are the cats sleeping on?                                                      | Is it safe for the pedestrians to cross the street?                                 | What other word is written for this sign?                                            | How many airplanes?                                                                   |
| <i>Ours:</i> car                                                                    | no                                                                                  | stop                                                                                 | 4                                                                                     |
| <i>Vgg+LSTM:</i> table                                                              | yes                                                                                 | new                                                                                  | 1                                                                                     |
| <i>Ground Truth:</i> car                                                            | no                                                                                  | stop                                                                                 | 4                                                                                     |

Table 4. Some examples for which our final model gives the right answer while the base line model **VggNet-LSTM** generates the wrong answer. Various question types are shown.



|                                                                                     |                                                                                     |                                                                                      |                                                                                       |
|-------------------------------------------------------------------------------------|-------------------------------------------------------------------------------------|--------------------------------------------------------------------------------------|---------------------------------------------------------------------------------------|
|    |    |    |    |
| What is he looking at?                                                              | What kind of meat is on this?                                                       | Which game is being played?                                                          | What brand is the bat bag?                                                            |
| <i>Ours:</i> toothbrush                                                             | <i>Ours:</i> bacon                                                                  | <i>Ours:</i> soccer                                                                  | <i>Ours:</i> nike                                                                     |
| <i>Vgg+LSTM:</i> camera                                                             | <i>Vgg+LSTM:</i> chicken                                                            | <i>Vgg+LSTM:</i> tennis                                                              | <i>Vgg+LSTM:</i> wilson                                                               |
| <i>Ground Truth:</i> toothbrush                                                     | <i>Ground Truth:</i> bacon                                                          | <i>Ground Truth:</i> soccer                                                          | <i>Ground Truth:</i> nike                                                             |
|    |    |    |    |
| Is this inside?                                                                     | What season does it look like?                                                      | Is this a healthy breakfast?                                                         | Is this meal healthy?                                                                 |
| <i>Ours:</i> no                                                                     | <i>Ours:</i> fall                                                                   | <i>Ours:</i> no                                                                      | <i>Ours:</i> yes                                                                      |
| <i>Vgg+LSTM:</i> yes                                                                | <i>Vgg+LSTM:</i> winter                                                             | <i>Vgg+LSTM:</i> yes                                                                 | <i>Vgg+LSTM:</i> no                                                                   |
| <i>Ground Truth:</i> no                                                             | <i>Ground Truth:</i> fall                                                           | <i>Ground Truth:</i> no                                                              | <i>Ground Truth:</i> yes                                                              |
|   |   |   |   |
| The green item on the pizza, what is it called?                                     | Does this animal have fur?                                                          | Is this a home office?                                                               | What letter is inside the blue circle?                                                |
| <i>Ours:</i> broccoli                                                               | <i>Ours:</i> no                                                                     | <i>Ours:</i> yes                                                                     | <i>Ours:</i> p                                                                        |
| <i>Vgg+LSTM:</i> carrots                                                            | <i>Vgg+LSTM:</i> yes                                                                | <i>Vgg+LSTM:</i> no                                                                  | <i>Vgg+LSTM:</i> b                                                                    |
| <i>Ground Truth:</i> broccoli                                                       | <i>Ground Truth:</i> no                                                             | <i>Ground Truth:</i> yes                                                             | <i>Ground Truth:</i> p                                                                |
|  |  |  |  |
| What type of food is this person eating?                                            | In what type of establishment is this taken?                                        | Is that meat on the plate?                                                           | What is being celebrated?                                                             |
| <i>Ours:</i> donut                                                                  | <i>Ours:</i> zoo                                                                    | <i>Ours:</i> yes                                                                     | <i>Ours:</i> birthday                                                                 |
| <i>Vgg+LSTM:</i> pizza                                                              | <i>Vgg+LSTM:</i> zebra                                                              | <i>Vgg+LSTM:</i> no                                                                  | <i>Vgg+LSTM:</i> pizza                                                                |
| <i>Ground Truth:</i> donut                                                          | <i>Ground Truth:</i> zoo                                                            | <i>Ground Truth:</i> yes                                                             | <i>Ground Truth:</i> birthday                                                         |
|  |  |  |  |
| What kind of building is this?                                                      | Is the weather cold or warm?                                                        | Is that normal a banana on a record?                                                 | What color is the snow?                                                               |
| <i>Ours:</i> barn                                                                   | <i>Ours:</i> cold                                                                   | <i>Ours:</i> no                                                                      | <i>Ours:</i> white                                                                    |
| <i>Vgg+LSTM:</i> church                                                             | <i>Vgg+LSTM:</i> sunny                                                              | <i>Vgg+LSTM:</i> yes                                                                 | <i>Vgg+LSTM:</i> blue                                                                 |
| <i>Ground Truth:</i> barn                                                           | <i>Ground Truth:</i> cold                                                           | <i>Ground Truth:</i> no                                                              | <i>Ground Truth:</i> white                                                            |

Table 5. Some examples for which our final model gives the right answer while the base line model **VggNet-LSTM** generates the wrong answer. Various question types are shown.



|                                                                                   |                                                                                   |                                                                                    |                                                                                     |
|-----------------------------------------------------------------------------------|-----------------------------------------------------------------------------------|------------------------------------------------------------------------------------|-------------------------------------------------------------------------------------|
|  |  |  |  |
| What season is it?                                                                | What shoe company is advertised?                                                  | Is this guy going to jump high?                                                    | What is on the keyboard?                                                            |
| <i>Ours:</i> fall                                                                 | <i>Ours:</i> vans                                                                 | <i>Ours:</i> no                                                                    | <i>Ours:</i> mouse                                                                  |
| <i>Ground Truth:</i> winter                                                       | <i>Ground Truth:</i> nike                                                         | <i>Ground Truth:</i> yes                                                           | <i>Ground Truth:</i> cat                                                            |

  

|                                                                                   |                                                                                   |                                                                                    |                                                                                     |
|-----------------------------------------------------------------------------------|-----------------------------------------------------------------------------------|------------------------------------------------------------------------------------|-------------------------------------------------------------------------------------|
|  |  |  |  |
| What color is the front of the tow truck?                                         | What kind of wood is the table made of?                                           | Where is the telephone?                                                            | How deep is water?                                                                  |
| <i>Ours:</i> red                                                                  | <i>Ours:</i> oak                                                                  | <i>Ours:</i> on desk                                                               | <i>Ours:</i> shallow                                                                |
| <i>Ground Truth:</i> white                                                        | <i>Ground Truth:</i> cherry                                                       | <i>Ground Truth:</i> on nightstand                                                 | <i>Ground Truth:</i> 10 feet                                                        |

  

|                                                                                    |                                                                                    |                                                                                     |                                                                                      |
|------------------------------------------------------------------------------------|------------------------------------------------------------------------------------|-------------------------------------------------------------------------------------|--------------------------------------------------------------------------------------|
|  |  |  |  |
| Who ate some of the cake?                                                          | What city is this?                                                                 | What utensils are shown?                                                            | What is the building facade made from?                                               |
| <i>Ours:</i> man                                                                   | <i>Ours:</i> new york                                                              | <i>Ours:</i> fork and knife                                                         | <i>Ours:</i> brick                                                                   |
| <i>Ground Truth:</i> person                                                        | <i>Ground Truth:</i> las vegas                                                     | <i>Ground Truth:</i> fork                                                           | <i>Ground Truth:</i> stone                                                           |

  

|                                                                                     |                                                                                     |                                                                                      |                                                                                       |
|-------------------------------------------------------------------------------------|-------------------------------------------------------------------------------------|--------------------------------------------------------------------------------------|---------------------------------------------------------------------------------------|
|  |  |  |  |
| What is she holding in her hand?                                                    | What creature is this?                                                              | What are the colors of the court?                                                    | What is on their hand?                                                                |
| <i>Ours:</i> ski poles                                                              | <i>Ours:</i> horse                                                                  | <i>Ours:</i> blue                                                                    | <i>Ours:</i> hot dog                                                                  |
| <i>Ground Truth:</i> ski pole                                                       | <i>Ground Truth:</i> pegasus                                                        | <i>Ground Truth:</i> blue and green                                                  | <i>Ground Truth:</i> glove                                                            |

  

|                                                                                     |                                                                                     |                                                                                      |                                                                                       |
|-------------------------------------------------------------------------------------|-------------------------------------------------------------------------------------|--------------------------------------------------------------------------------------|---------------------------------------------------------------------------------------|
|  |  |  |  |
| What's on the floor?                                                                | Who took this photo?                                                                | What food is this, really?                                                           | What kind of weather is this?                                                         |
| <i>Ours:</i> scissors                                                               | <i>Ours:</i> photographer                                                           | <i>Ours:</i> chicken                                                                 | <i>Ours:</i> rainy                                                                    |
| <i>Ground Truth:</i> tape                                                           | <i>Ground Truth:</i> christopher brown                                              | <i>Ground Truth:</i> cake                                                            | <i>Ground Truth:</i> cloudy                                                           |

Table 6. Some failure cases for our final model
